# Supplementary material for: Effect of the Resveratrol Rice DJ526 on Longevity
Source: PubMed Central journal article supplement (PMC6723356; doi:10.3390/nu11081804), 2019-08-05
Supplement: nutrients-11-01804-s001.pdf [file nutrients-11-01804-s001.pdf]

## Supplementary Materials

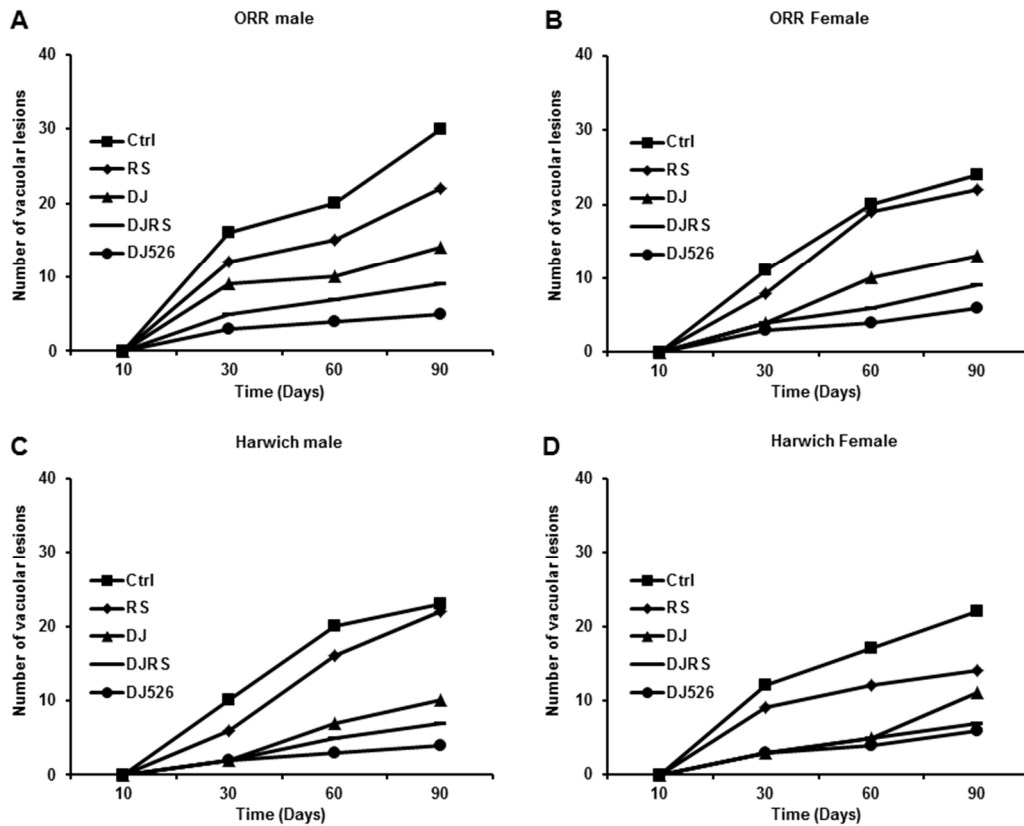

**Figure S1.** The resveratrol rice DJ526 reduced the number of vacuolar lesions in the brains of *D. melanogaster*. (A-D) The number of age-related vacuolar lesions in the brains of male and female flies from the ORR and Harwich strains. The Ctrl represents standard cornmeal medium; RS represents cornmeal medium supplemented with resveratrol at 31.54  $\mu\text{g/L}$ , the equivalent amount of resveratrol found in the DJ526 media; DJ represents the medium in which 50% of cornmeal was replaced with Dongjin rice; DJRS represents the medium in which 50% of cornmeal was replaced with Dongjin rice and supplemented with resveratrol at 31.54  $\mu\text{g/L}$ , and DJ526 represents the medium in which 50% of the cornmeal was replaced with the resveratrol rice DJ526 (Table S1). The quantification of the vacuolar lesions based on the histological analysis of the *Drosophila* brains were observed at the 10<sup>th</sup>, 30<sup>th</sup>, 60<sup>th</sup> and 90<sup>th</sup> days post-eclosion ( $n=30$ ).

**Table S1.** Media compositions used to maintain the *D. melanogaster* ORR and Harwich strains.

| Ingredient                            | Ctrl | RS    | DJ | DJRS  | DJ526 |
|---------------------------------------|------|-------|----|-------|-------|
| Corn meal (g/L)                       | 84   | 83.99 | 42 | 42    | 42    |
| Active dry yeast (g/L)                | 24   | 24    | 24 | 24    | 24    |
| Sucrose (g/L)                         | 47   | 47    | 47 | 47    | 47    |
| Agar (g/L)                            | 8    | 8     | 8  | 8     | 8     |
| Molasses (ml/L)                       | 25   | 25    | 25 | 25    | 25    |
| 10% Methyl parahydroxybenzoate (ml/L) | 10   | 10    | 10 | 10    | 10    |
| Propionic acid (ml/L)                 | 4    | 4     | 4  | 4     | 4     |
| Resveratrol ( $\mu\text{g/L}$ )       | 0    | 31.54 | 0  | 31.54 | 0     |
| DJ rice (g/L)                         | 0    | 0     | 42 | 42    | 0     |
| DJ526 rice (g/L)                      | 0    | 0     | 0  | 0     | 42    |
